# Supplementary material for: Highly sensitive fibre surface-enhanced Raman scattering probes fabricated using laser-induced self-assembly in a meniscus
Source: Royal Society of Chemistry journal article supplement (doi:10.1039/c5nr06773a), 2016-01-01
Supplement: c5nr06773a1.pdf [file c5nr06773a1.pdf]

## Supplementary Information

### High-sensitive fiber SERS probes fabricated with laser-induced self-assembly method in meniscus

Ye Liu,<sup>a</sup> Zhulin Huang,<sup>c</sup> Fei Zhou,<sup>c</sup> Xing Lei,<sup>a</sup> Bo Yao,<sup>a</sup> Guowen Meng,<sup>c</sup> and Qinghe Mao<sup>\*ab</sup>

<sup>a</sup> Anhui Provincial Key Laboratory of Photonics Devices and Materials, Anhui Institute of Optics and Fine

Mechanics, Chinese Academy of Sciences, Hefei, 230031, P. R. China. E-mail: [mqinghe@aiofm.ac.cn](mailto:mqinghe@aiofm.ac.cn).

<sup>b</sup> University of Science and Technology of China, Hefei, 230026, P. R. China.

<sup>c</sup> Key Laboratory of Materials Physics and Anhui Key lab of Nanomaterials and Nanotechnology, Institute of

Solid State Physics, Chinese Academy of Sciences, Hefei, 230031, P. R. China.

## 1. Supplementary figures

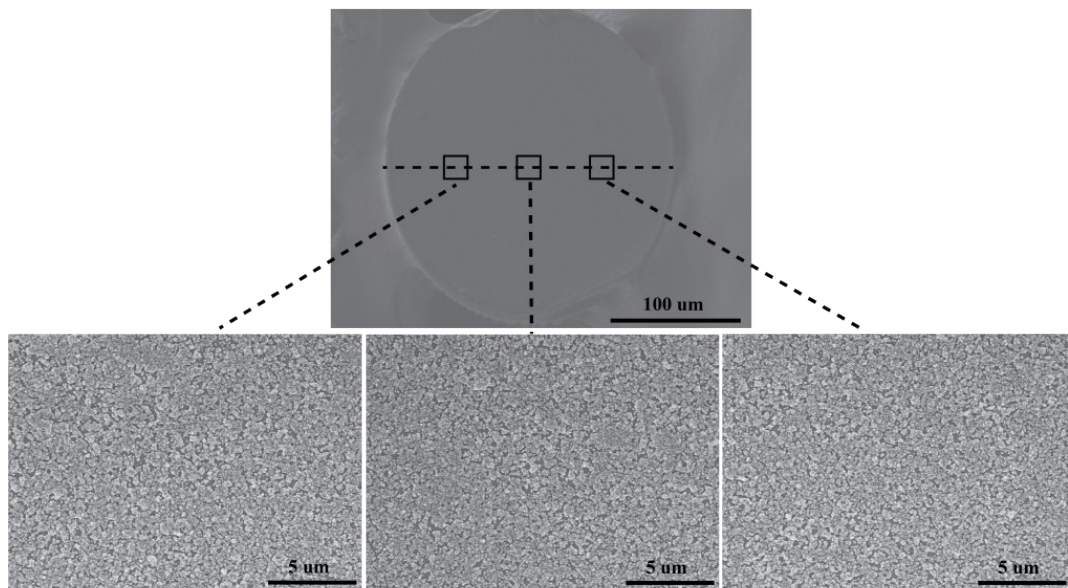

**Fig. S1** SEM images of fiber SERS probe at different positions along the diameter of fiber. The probe is fabricated with the laser power of 70 mW and laser irradiation time of 70 s. Basically uniform distributions of nanoparticles at the whole fiber facet can be observed.

## **2. Supplementary Videos**

Three Videos record the dynamical growth process of fiber SERS probes fabricated with different growth conditions as Table 1 (Video I: Case A, Video II: Case B and Video III: Case C).
